# Supplementary material for: SnS2/MXene derived TiO2 hybrid for ultra-fast room temperature NO2 gas sensing
Source: Royal Society of Chemistry journal article supplement (doi:10.1039/d1tc00197c), 2021-01-01
Supplement: d1tc00197c1.pdf [file d1tc00197c1.pdf]

## Electronic Supplementary Information for

# SnS<sub>2</sub>/MXene derived TiO<sub>2</sub> hybrid for ultra-fast room temperature NO<sub>2</sub> gas sensing

*Tianding Chen, Wenhao Yan, Ying Wang, Jinli Li, Haibo Hu, and Derek Ho\**

Department of Materials Science and Engineering, City University of Hong Kong, 83 Tat Chee Avenue, Kowloon, Hong Kong, China.

\* Corresponding author, e-mail address: [derekho@cityu.edu.hk](mailto:derekho@cityu.edu.hk)

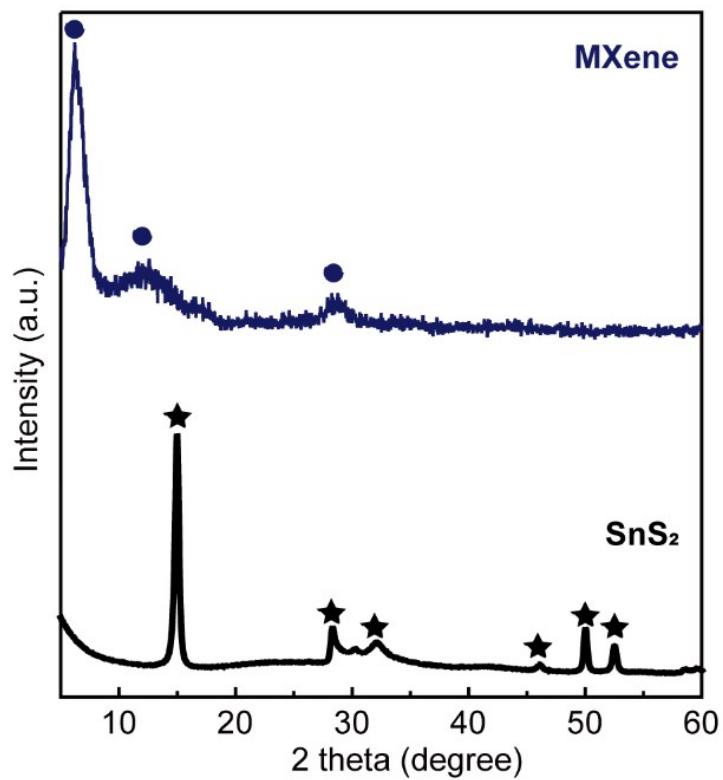

**Fig. S1.** XRD spectra of the as-prepared SnS<sub>2</sub> and as-prepared MXene.

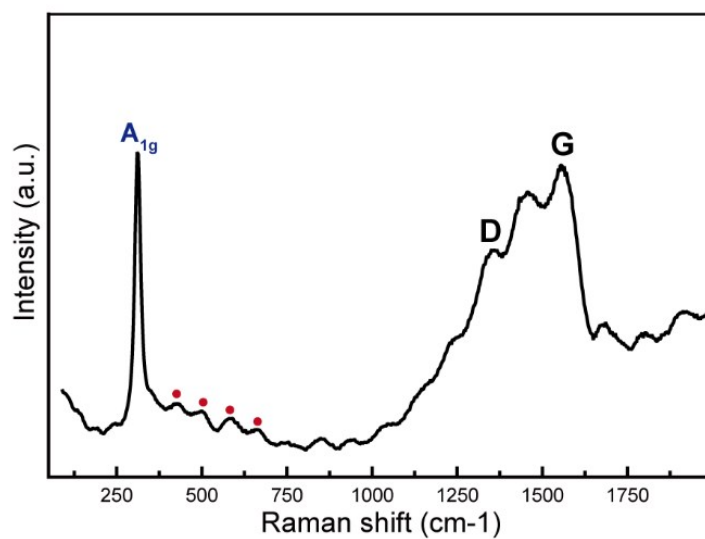

**Fig. S2.** Raman spectrum of the SMT hybrid.

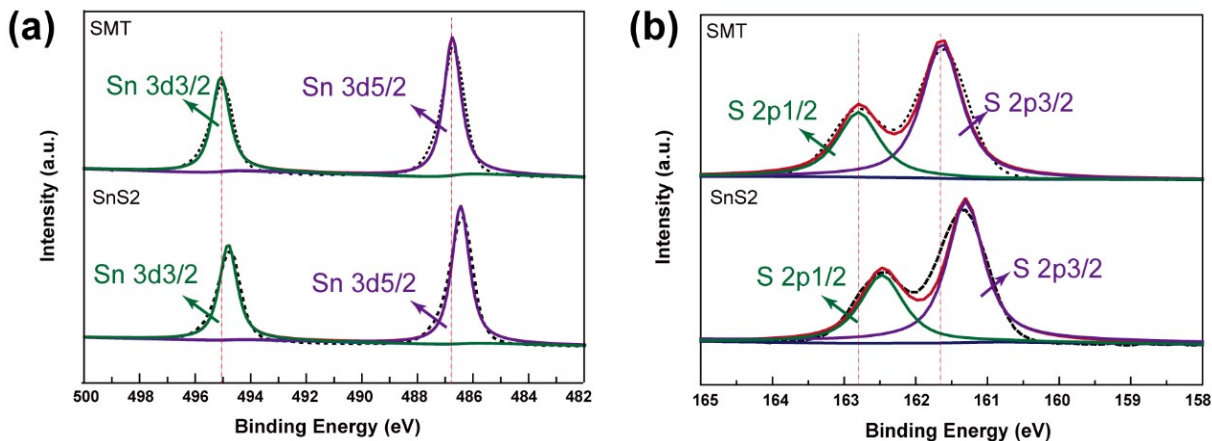

**Fig. S3.** XPS spectra of SMT and SnS<sub>2</sub>: (a) Sn<sup>4+</sup> and (b) S<sup>2-</sup>.

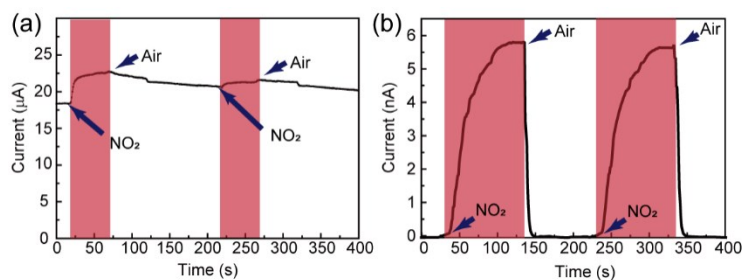

**Fig. S4.** Room temperature 1000 ppm NO<sub>2</sub> sensing response of (a) ST hybrid (i.e. does not contain MXene), and (b) SMT-2 hybrid. Results show that MXene significantly enhances gas sensing performance.
